# Supplementary material for: Capture of radioactive cations from water using niobate nanomaterials with layered and tunnel structures
Source: Royal Society of Chemistry journal article supplement (doi:10.1039/c5ra10907h), 2015-01-01
Supplement: c5ra10907h1.pdf [file c5ra10907h1.pdf]

**Supporting Information** for

**Capture of Radioactive Cations from Water Using Niobate  
Nanomaterials with Layered and Tunnel Structures**

Jin Sun, <sup>\*a</sup> Long Liu, <sup>a</sup> Xiaoliang Zhao, <sup>a</sup> Shuanglei Yang, <sup>b</sup> Sridhar Komarneni, <sup>c</sup>

Dongjiang Yang<sup>\*a,d</sup>

<sup>a</sup>Collaborative Innovation Center for Marine Biomass Fibers, Materials and Textiles of Shandong Province; College of Chemistry, Chemical and Environmental Engineering, Qingdao University, Qingdao 266071, China. E-mail: d.yang@qdu.edu.cn.

<sup>b</sup>State Key Laboratory of Powder Metallurgy, Central South University, Changsha, China 410083.

<sup>c</sup>Materials Research Institute and Department of Ecosystem Science and Management, The Pennsylvania State University, University Park, Pennsylvania 16802, United States.

<sup>d</sup>Queensland Micro- and Nanotechnology Centre (QMNC), Griffith University, Nathan, Brisbane, QLD 4111, Australia.

**Table S1.** Phase compositions and crystallographic parameters for nanofibers in this study

| Formula         | $\text{KNb}_3\text{O}_8$   | $\text{Na}_2\text{Nb}_2\text{O}_6 \cdot \text{H}_2\text{O}$ |
|-----------------|----------------------------|-------------------------------------------------------------|
| Crystal system  | orthorhombic               | monoclinic                                                  |
| Space-group     | $Amm$                      | $C2/c$                                                      |
| Cell parameters | $a=8.903(3) \text{ \AA}$   | $a=17.0511 \text{ \AA}$                                     |
|                 | $b=21.16(2) \text{ \AA}$   | $b=5.0293 \text{ \AA}$                                      |
|                 | $c=3.799(2) \text{ \AA}$   | $c=16.4921 \text{ \AA}$                                     |
|                 |                            | $\beta=113.9420^\circ$                                      |
|                 |                            |                                                             |
| Cell ratio      | $a/b=0.4207$               | $a/b=3.3904$                                                |
|                 | $b/c=5.5699$               | $b/c=0.3050$                                                |
|                 | $c/a=0.4267$               | $c/a=0.9672$                                                |
| Cell volume     | $715.68(81) \text{ \AA}^3$ | $1292.59 \text{ \AA}^3$                                     |
| Z               | 4                          | 8                                                           |

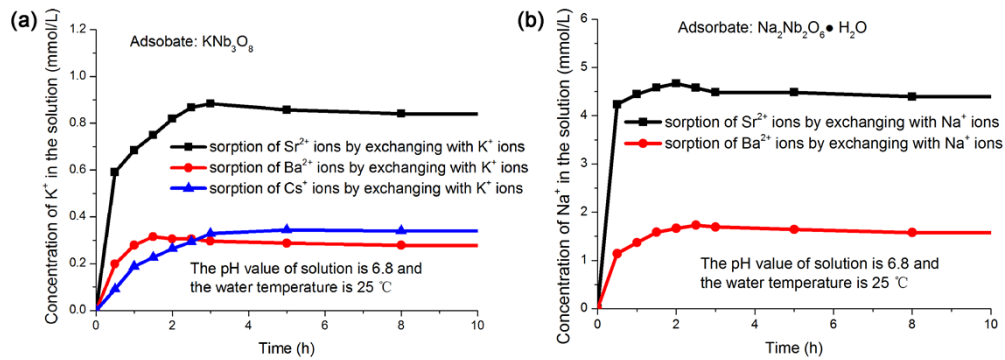

**Fig. S1.** The plot of the  $K^+$  ( $Na^+$ ) concentration with ion-exchange time when the initial concentration of M cations is 5 mmol/L and the amount of adsorbent = 1 g/L ( $M=Sr^{2+}$ ,  $Ba^{2+}$  or  $Cs^+$ ).

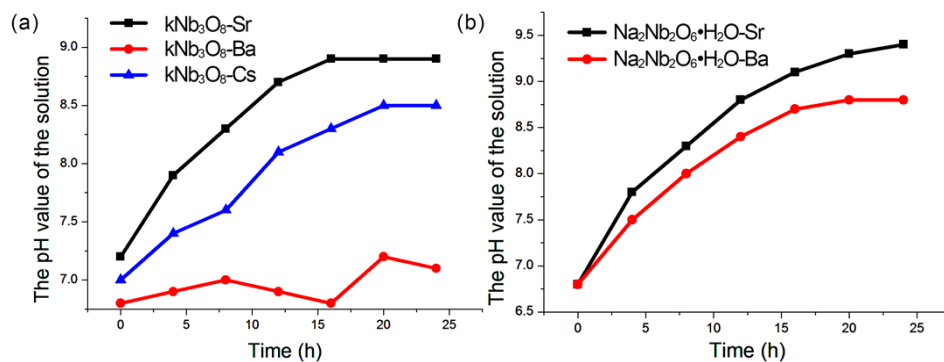

**Fig. S2.** The pH value of the solution with desorption time when 100 mg of (a)  $KNb_3O_8$ -M or (b)  $Na_2Nb_2O_6 \cdot H_2O$ -M were redispersed into 100 mL deionized water for 24 h ( $M=Sr^{2+}$ ,  $Ba^{2+}$  or  $Cs^+$ ).

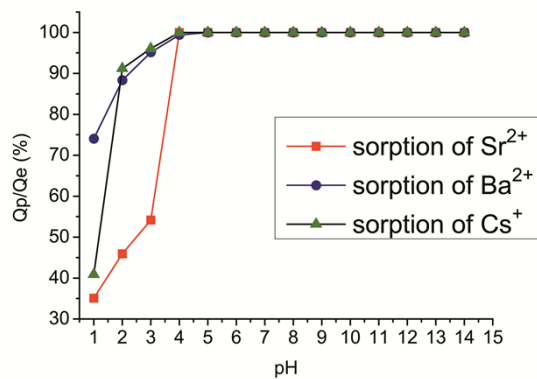

**Fig. S3.** Influence of the pH value of the solutions on equilibrium capacity for  $Sr^{2+}$ ,  $Ba^{2+}$  and  $Cs^+$  sorptions.  $Q_e$  is the equilibrium capacity in normal environment and  $Q_p$  is the equilibrium capacity in solutions with various pH values. The adsorbent is  $KNb_3O_8$  nanorods.

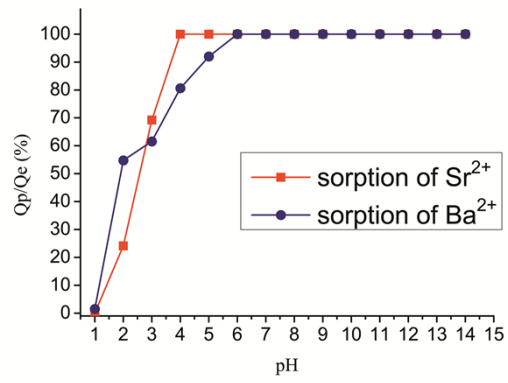

**Fig. S4.** Influence of the pH value of the solutions on equilibrium capacity for  $Sr^{2+}$  and  $Ba^{2+}$  sorptions. The adsorbent is  $Na_2Nb_2O_6 \cdot H_2O$  nanofibers.
